# Supplementary material for: TOP1MT deficiency promotes GC invasion and migration via the enhancements of LDHA expression and aerobic glycolysis
Source: PubMed Central journal article supplement (PMC5633043; doi:10.1530/erc-17-0058), 2017-09-05

# Supplemental figure 1

## SGC-7901 (passage number: 13)

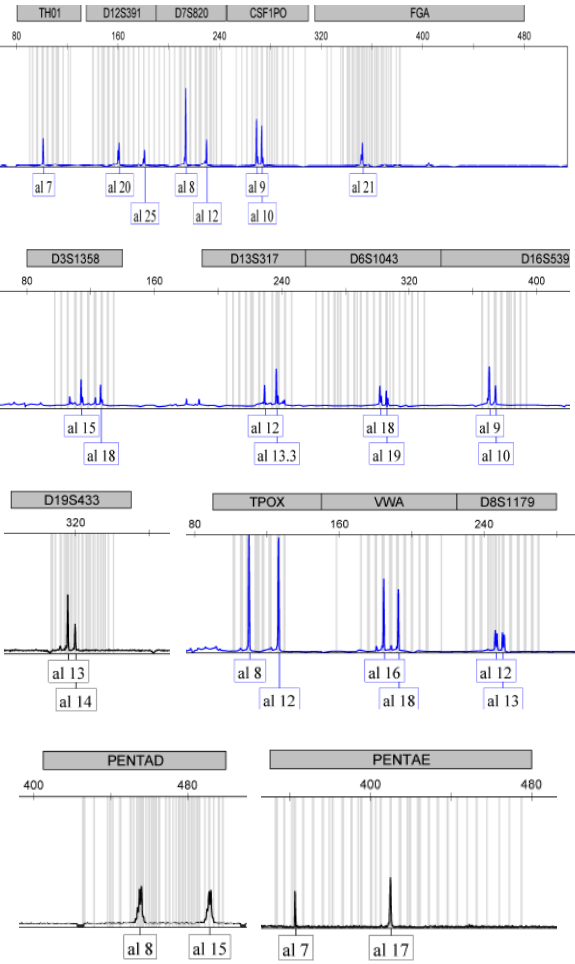

## MKN-7 (passage number: 14)

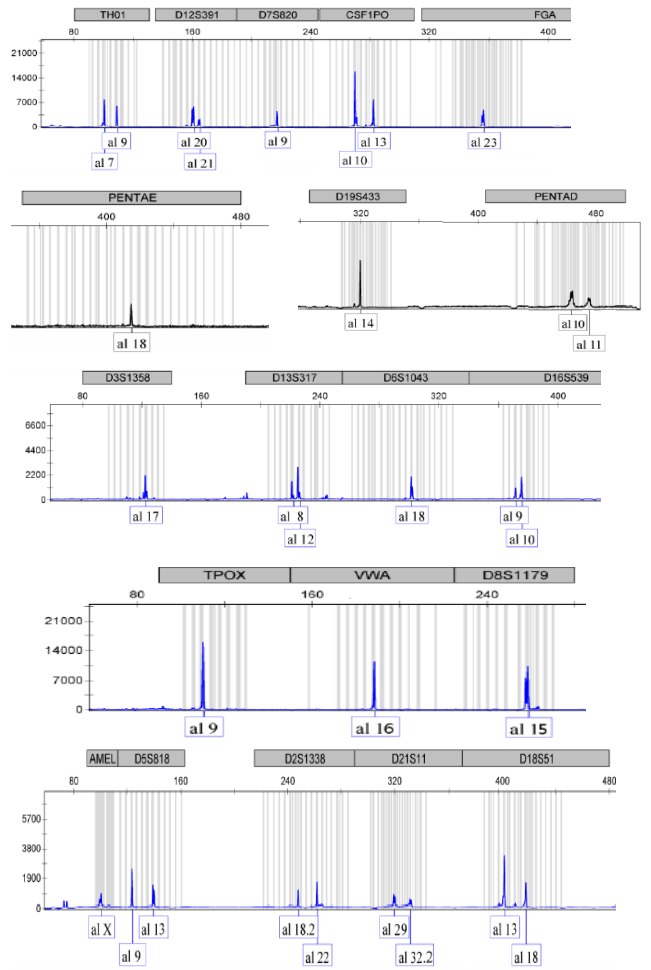

## MKN-45 (passage number: 11)

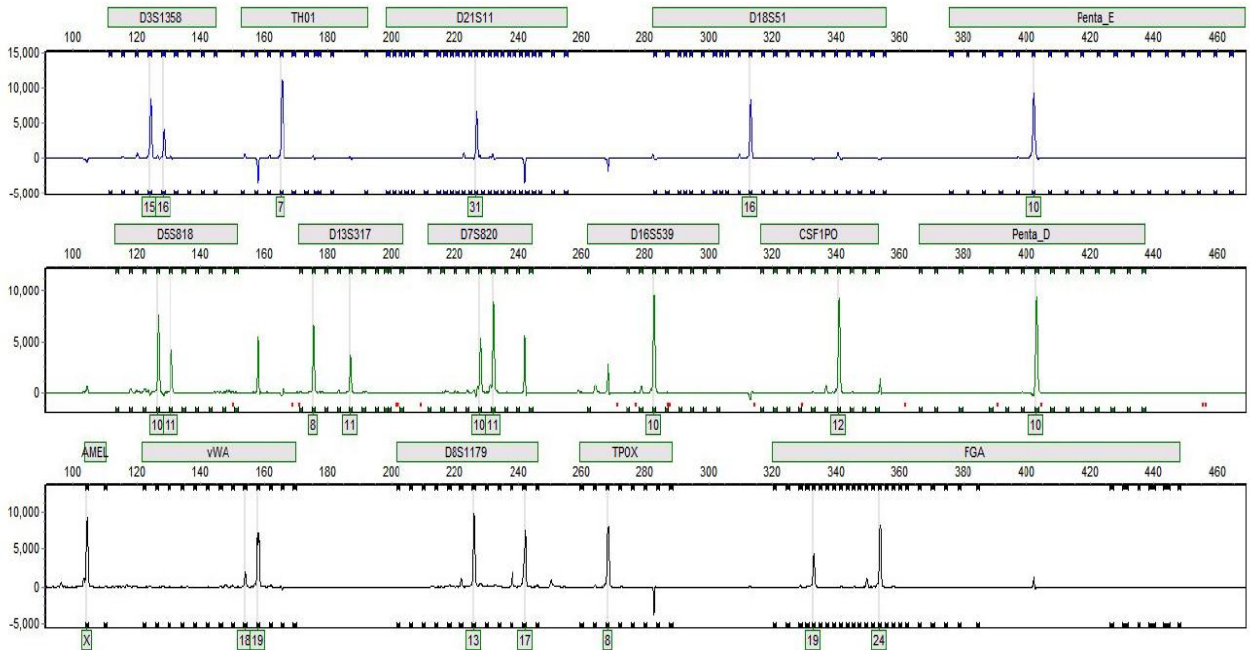

### AGS (passage number: 14)

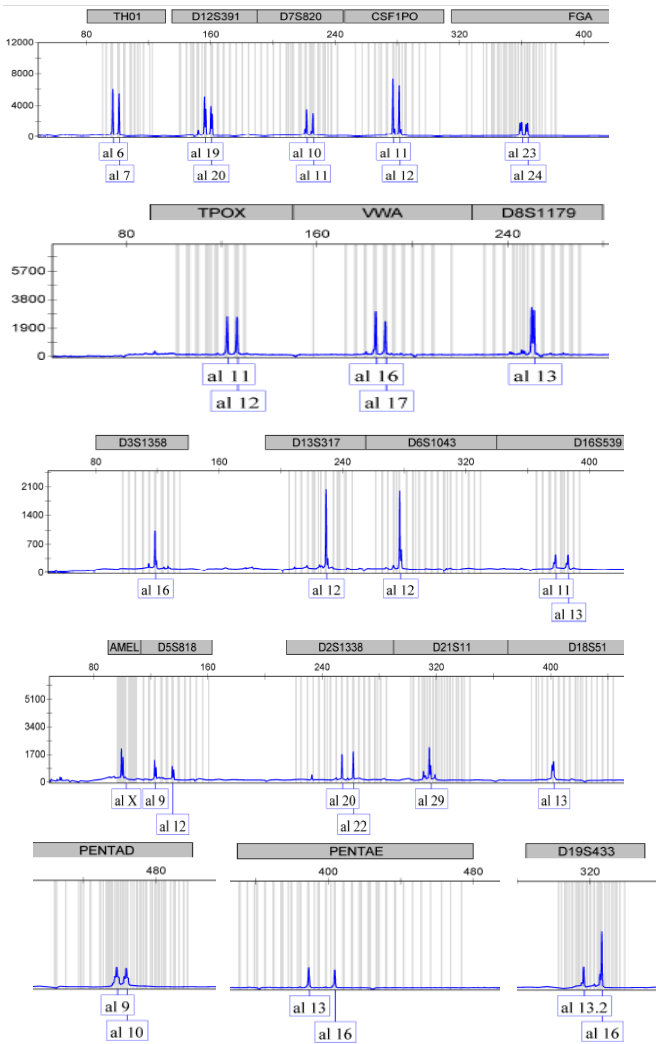

### MGC-803 (passage number: 13)

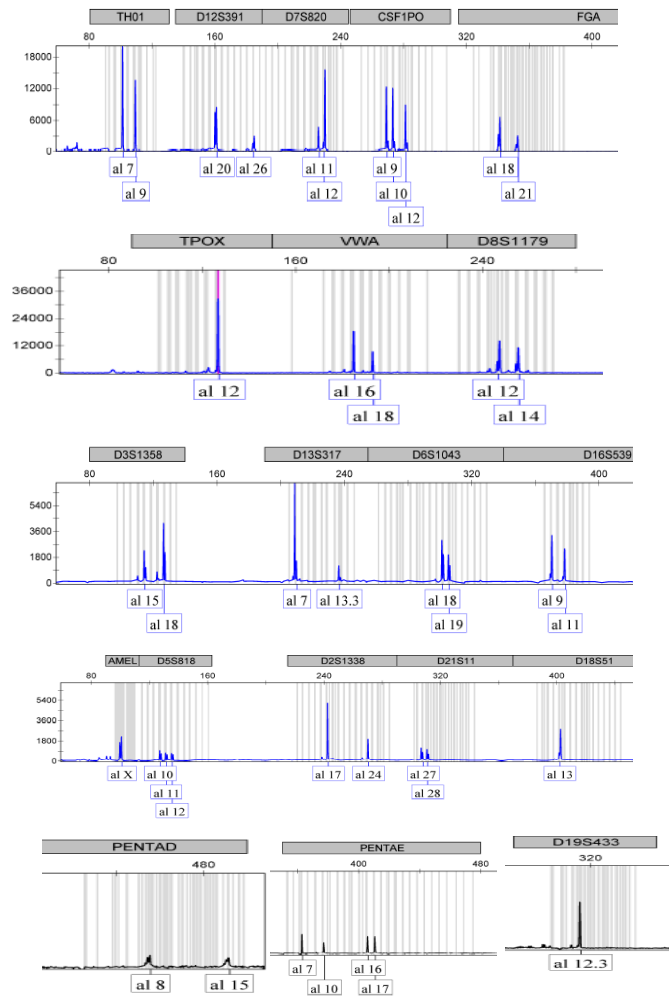

### MKN-28 (passage number: 14)

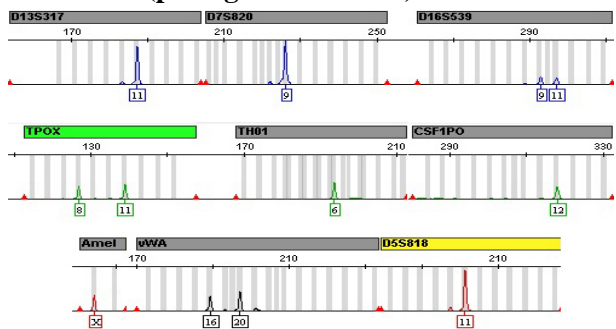

### BGC-823 (passage number: 11)

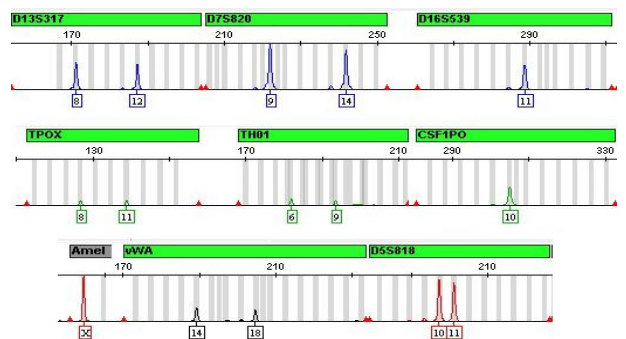

### GES-1 (passage number: 15)

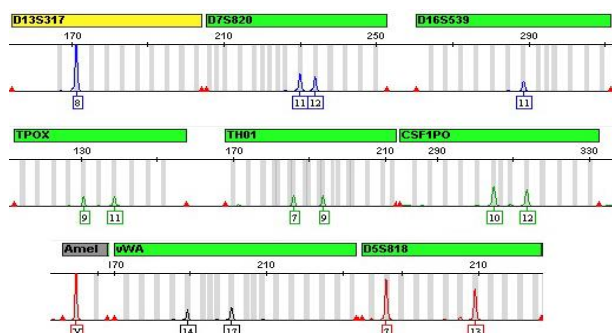

Supplement: erc-24-565-s001.pdf [file erc-24-565-s001.pdf]
