# Supplementary material for: TOP1MT deficiency promotes GC invasion and migration via the enhancements of LDHA expression and aerobic glycolysis
Source: PubMed Central journal article supplement (PMC5633043; doi:10.1530/erc-17-0058), 2017-09-05

# Supplemental figure 3

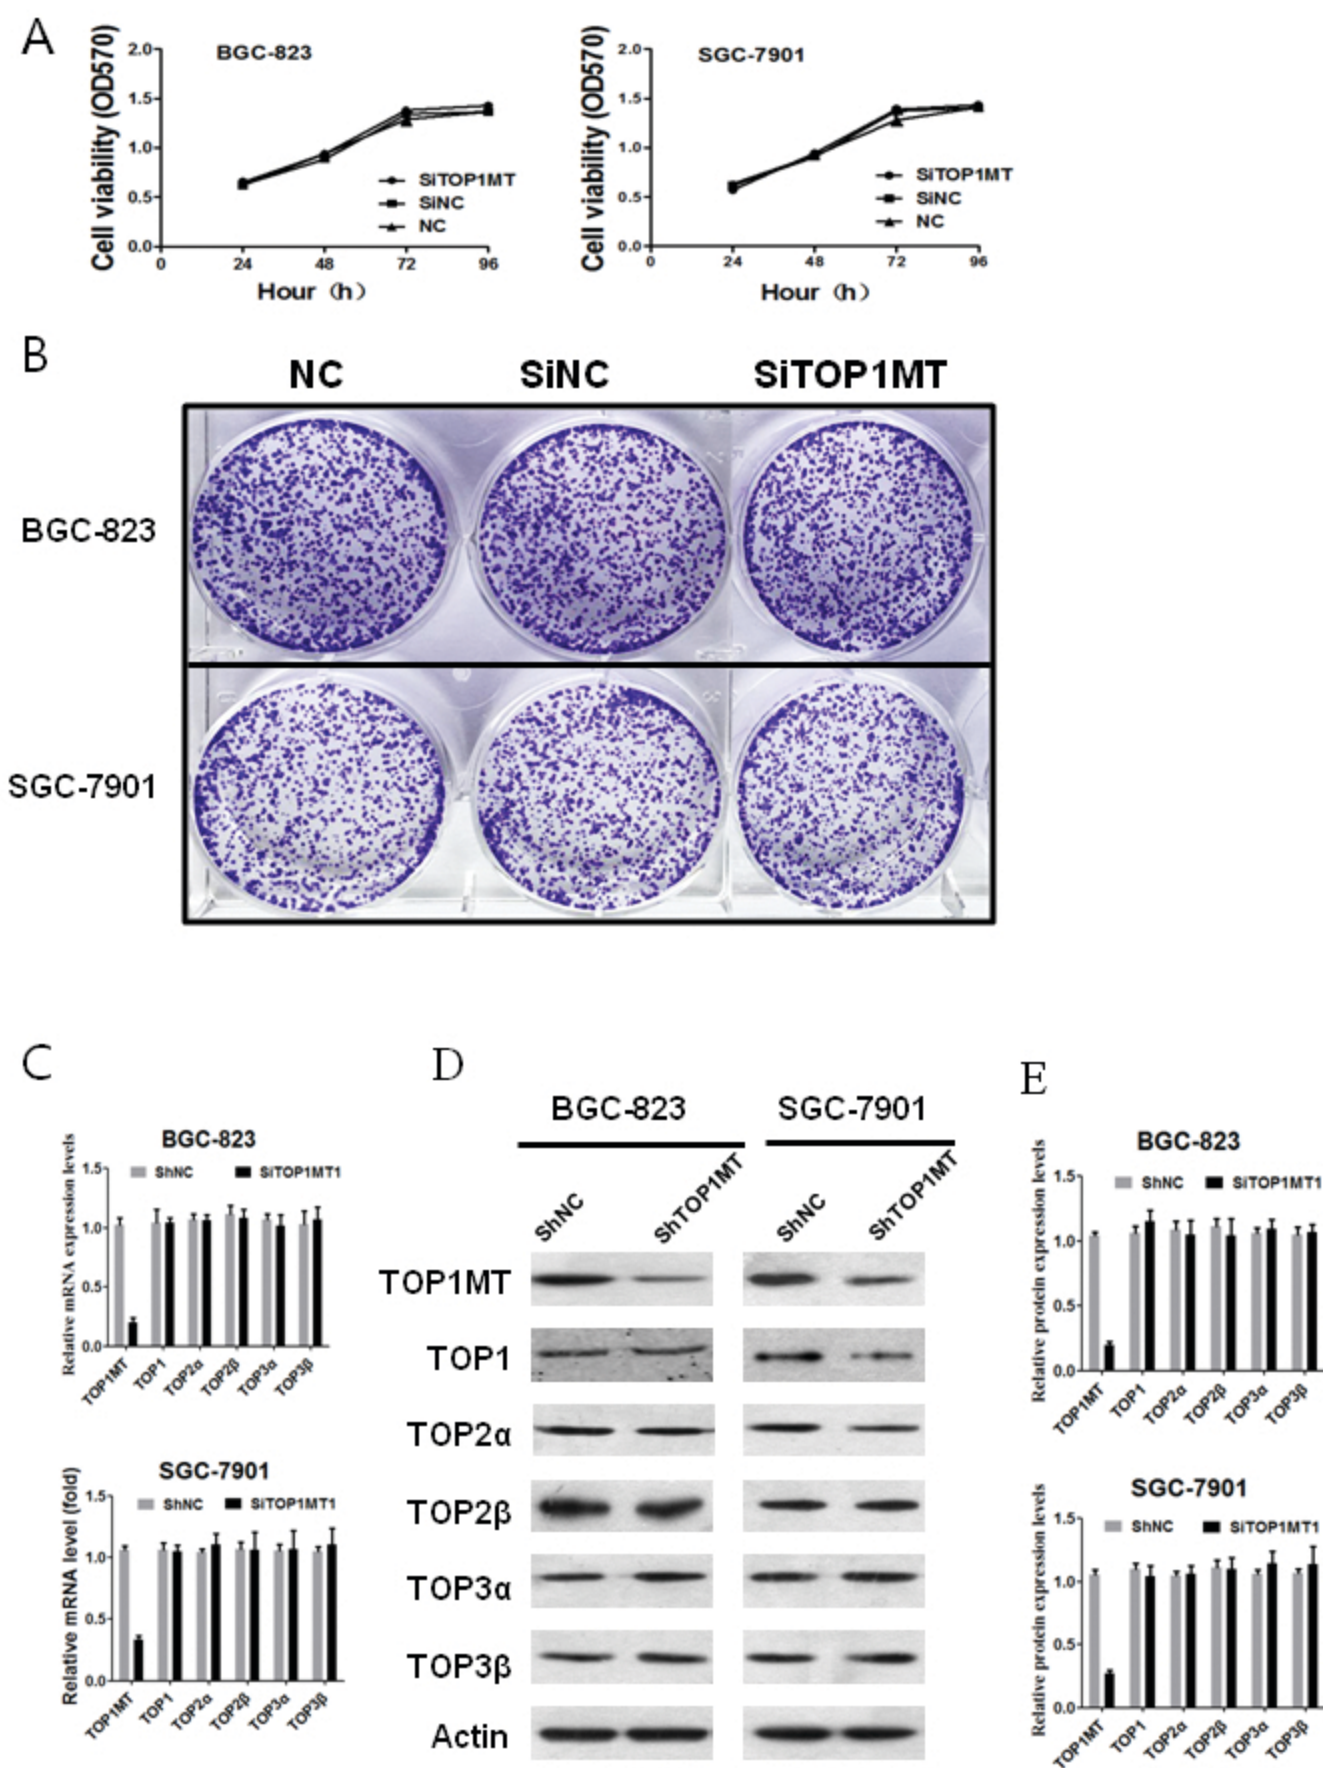

Supplement: erc-24-565-s003.pdf [file erc-24-565-s003.pdf]
