# Supplementary material for: TOP1MT deficiency promotes GC invasion and migration via the enhancements of LDHA expression and aerobic glycolysis
Source: PubMed Central journal article supplement (PMC5633043; doi:10.1530/erc-17-0058), 2017-09-05

# Supplemental figure 5

A

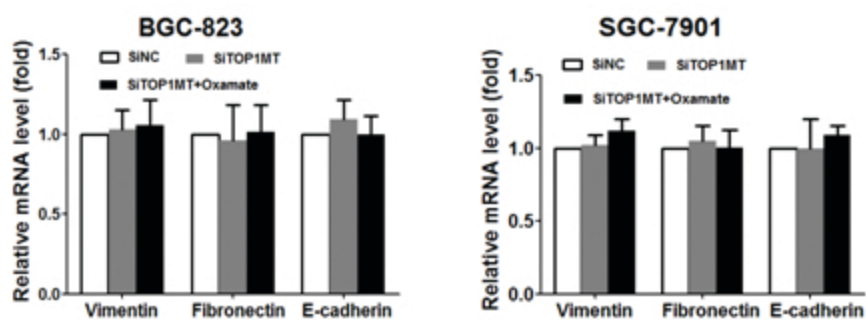

B

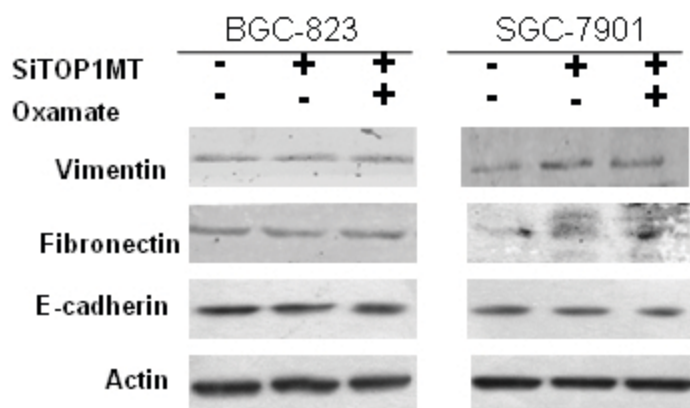

C

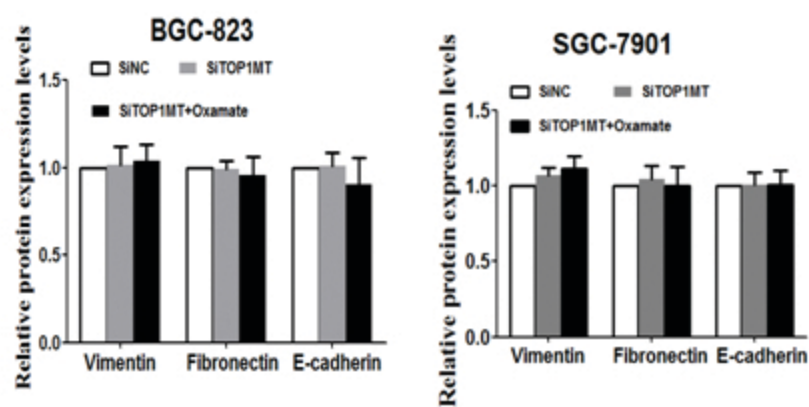

Supplement: erc-24-565-s005.pdf [file erc-24-565-s005.pdf]
