# Supplementary material for: TOP1MT deficiency promotes GC invasion and migration via the enhancements of LDHA expression and aerobic glycolysis
Source: PubMed Central journal article supplement (PMC5633043; doi:10.1530/erc-17-0058), 2017-09-05
Supplement: erc-24-565-t001.pdf [file erc-24-565-t001.pdf]

**Supplemental Table 1. Primers used for reverse transcription  
(RT)-PCR analyses**

| <b>Gene name</b>   | <b>Primer sequence (5' to 3')</b>  | <b>Primer length (bp)</b> |
|--------------------|------------------------------------|---------------------------|
| <i>TOP1MT</i>      | FW: CGGTGGCCCTGTATTTTCAT           | 19                        |
|                    | RV: GCCTCACCGTCCCTCCCTC            | 18                        |
| <i>LDHA</i>        | FW: GTTCACAAGCAGGT                 | 14                        |
|                    | RV: GGTTGAGAGTGCTT                 | 14                        |
| <i>Vimentin</i>    | FW: CGCCAGATGCGTGAAATGG            | 19                        |
|                    | RV: ACCAGAGGGAGTGAATCCAGA          | 21                        |
| <i>Fibronectin</i> | FW: ATGATGAGGTGCACGTGTGT           | 20                        |
|                    | RV: CCCTGACCGAAGCATGTACA           | 20                        |
| <i>E-cadherin</i>  | FW: ATGAGTGTCCCCCGGTATCT           | 20                        |
|                    | RV: CAAACACGAGCAGAGAATCA           | 20                        |
| <i>Glut1</i>       | FW: TACCCTGGATGTCCTATCTG           | 20                        |
|                    | RV: CACACAGTTGCTCCACATAC           | 20                        |
| $\beta$ -actin     | FW: TGACGGGGTCACCCACACTGTGCCCATCTA | 30                        |
|                    | RV: GAAGCATTGCGGTGGACGA TGGAGGG    | 27                        |

*TOP1MT*: mtochondrial topoisomerase I; *LDHA*: lactate dehydrogenase A; *Glut1*: glucose transporter 1
